# Supplementary material for: The Ozone Monitoring Instrument: Overview of twelve years in space
Source: Copernicus journal article supplement (doi:10.5194/acp-2017-487), 2017-07-20

OMI UV Index mean at local noon time on 16/10/2013

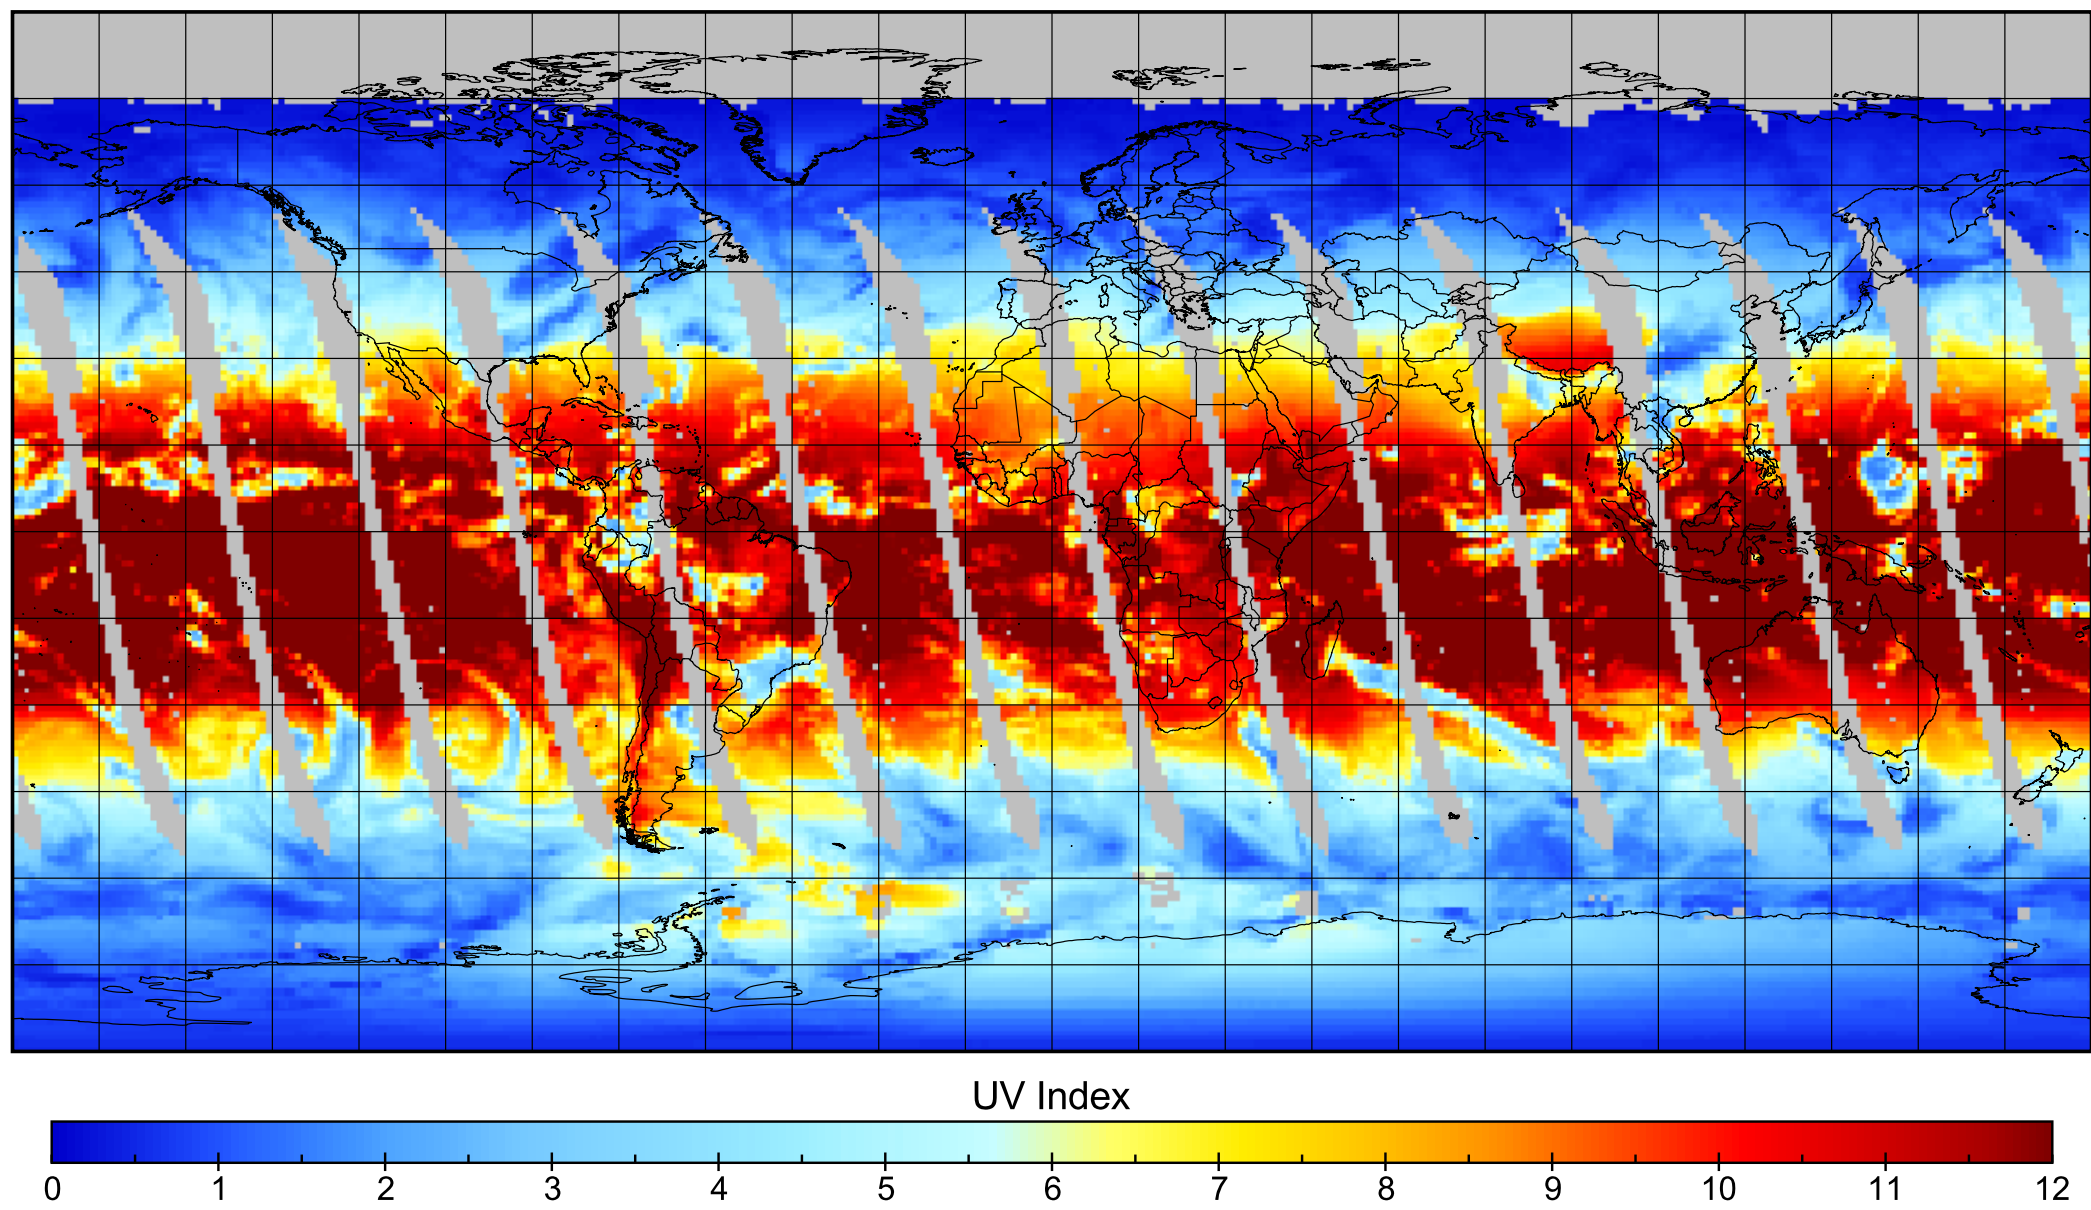

Supplement: Supplementary file [file acp-2017-487-AC1-supplement.zip]
